# Supplementary material
Source: PubMed Central journal article supplement (PMC3773224)
Supplement: NIHMS505664-supplement-supplement_1.pdf [file NIHMS505664-supplement-supplement_1.pdf]

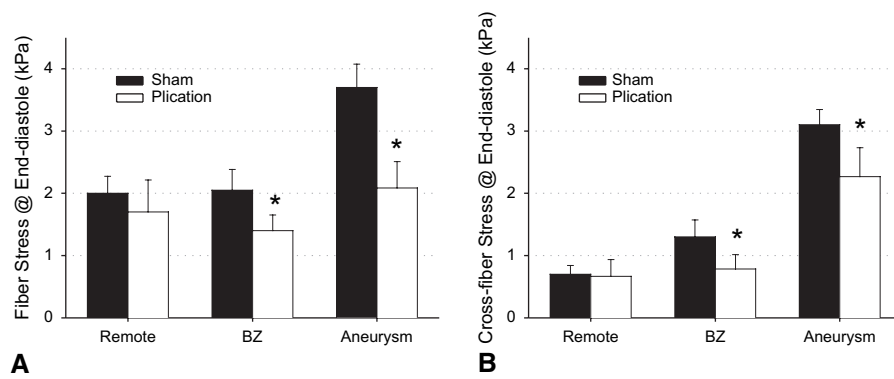

**Figure E1.** End-diastolic fiber (A) and cross-fiber (B) stress. Notice the scale is one tenth of that in **Figures 3C** and **4C**. \* $P < .05$  plication versus sham. **BZ**, Border zone.

**TABLE E1. Material properties**

| Animal        | C             | $b_f$           | $b_t$         | $b_{fs}$       | Scale $T_{max}$ |
|---------------|---------------|-----------------|---------------|----------------|-----------------|
| 305           | 0.045         | 26.828          | 19.325        | 21.604         | 130%            |
| 356           | 1.300         | 9.200           | 2.000         | 9.250          | 115%            |
| 357           | 0.300         | 33.535          | 16.909        | 21.604         | 85%             |
| 363           | 0.800         | 6.500           | 2.000         | 25.900         | 65%             |
| 109           | 0.500         | 9.500           | 2.000         | 25.900         | 85%             |
| 346           | 0.363         | 9.200           | 2.000         | 25.900         | 80%             |
| Mean $\pm$ SD | $0.5 \pm 0.4$ | $15.8 \pm 11.4$ | $7.4 \pm 8.4$ | $21.7 \pm 6.4$ | $79\% \pm 19\%$ |

SD, Standard deviation. C = 0.290,  $b_f$  = 33.17, and  $b_t$  = 41.56 in the aneurysm;  $b_{fs}$  was constant across all regions.  $T_{max}$  was reduced by one half in the border zone.
